# Supplementary material for: Non-parabolic potential dependence of optical second harmonic generation from the Si(111) electrode/electrolyte interface
Source: Royal Society of Chemistry journal article supplement (doi:10.1039/c8cp05621h), 2018-01-01
Supplement: c8cp05621h1.pdf [file c8cp05621h1.pdf]

## **Supporting Information**

# **Non-parabolic Potential Dependence of Optical Second Harmonic Generation from Si(111) Electrode/Electrolyte Interface**

Hong-tao Bian<sup>1</sup>, Yuan Guo<sup>2\*</sup> and Hong-fei Wang<sup>3\*</sup>

1. Key Laboratory of Applied Surface and Colloid Chemistry, Ministry of Education, School of Chemistry and Chemical Engineering, Shaanxi Normal University, Xi'an, 710119, China
2. Beijing National Laboratory for Molecular Sciences, State Key Laboratory of Molecular Reaction Dynamics, Institute of Chemistry, Chinese Academy of Sciences, University of Chinese Academy of Sciences, Beijing, 100190, China
3. Department of Chemistry and Shanghai Key Laboratory of Molecular Catalysis and Innovative Materials, Fudan University, Shanghai, 200433, China

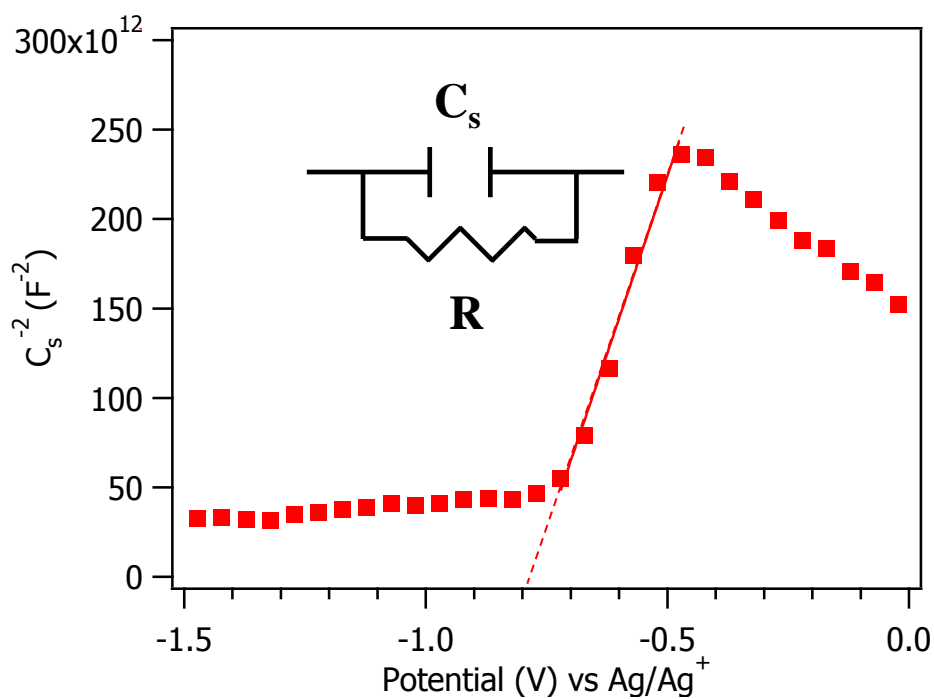

**FIG. S1:** The Mott-Schottky plot in Fig. 2 with the inversed x-axis.

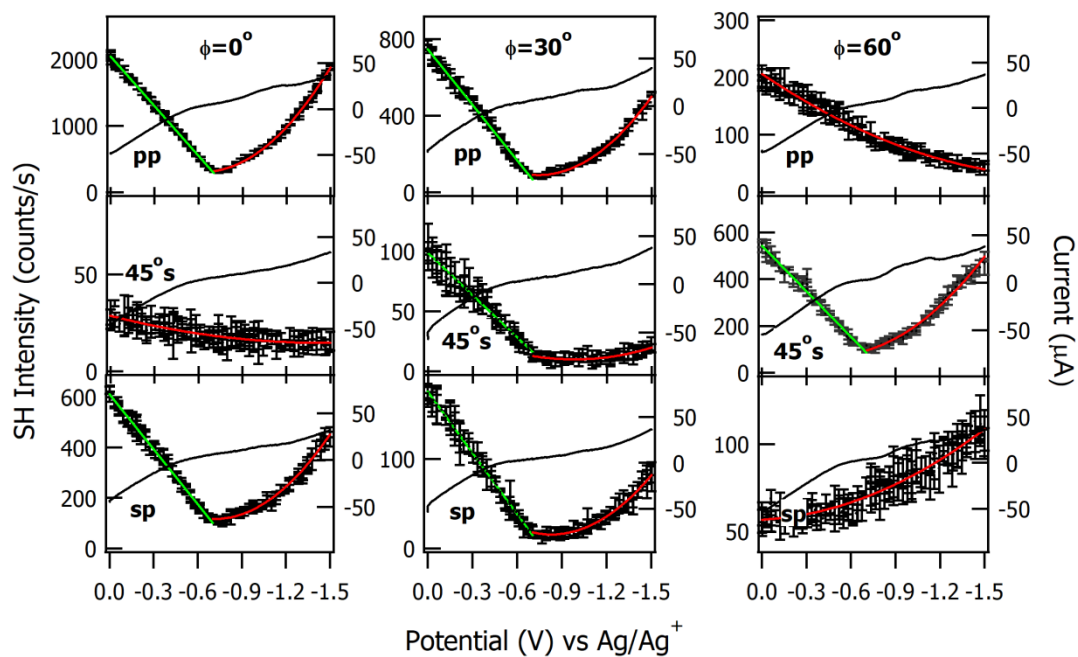

**FIG. S2:** The SHG data as in Fig. 3 with error bars.
